# Supplementary material for: Distinct miRNA Gene Expression Profiles Among the Nodule Tissues of Lung Sarcoidosis, Tuberculous Lymphadenitis and Normal Healthy Control Individuals
Source: Front Med (Lausanne). 2020 Oct 16;7:527433. doi: 10.3389/fmed.2020.527433 (PMC7596360; doi:10.3389/fmed.2020.527433)
Supplement: Supplementary file 1 [file Data_Sheet_1.docx]

Supplementary Material

# Supplementary Tables

**Table S1.** Demographic characteristics of the patients (Screening groups)

|  | SAR(n=3) | | | TBLN(n=3) | | | Con(n=3) | | |
| --- | --- | --- | --- | --- | --- | --- | --- | --- | --- |
| Number | SAR1 | SAR2 | SAR3 | TBLN1 | TBLN2 | TBLN3 | Con1 | Con2 | Con3 |
| Sex(F/W) | W | W | F | W | W | F | W | W | F |
| Age(years) | 32 | 34 | 40 | 32 | 34 | 40 | 32 | 34 | 40 |

Abbreviations: SAR, sarcoidosis; TBLN, tuberculous lymphadenitis; Con, control.

**Table S2.** Differentially expressed miRNAs in the lymph nodes of patients with SAR, TBLN and Con(*P*<0.05)

| **SAR Versus Con** | | | | **TBLN Versus Con** | | | | **SAR Versus TBLN** | | |
| --- | --- | --- | --- | --- | --- | --- | --- | --- | --- | --- |
| **Has-miRNA** | **-△△CT** | ***P* Value** | **Has-miRNA** | | **-△△CT** | ***P* Value** | **Has-miRNA** | | **-△△CT** | ***P* Value** |
| | hsa-let-7b-002619 | | --- | | hsa-let-7c-000379 | | hsa-miR-103-000439 | | hsa-miR-106a-  002169 | | hsa-miR-106b-  000442 | | hsa-miR-10a-000387 | | hsa-miR-125a-5p-002198 | | hsa-miR-125b-000449 | | hsa-miR-128a-002216 | | hsa-miR-130b-000456 | | hsa-miR-133a-002246 | | hsa-miR-139-5p-002289 | | hsa-miR-142-3p-000464 | | hsa-miR-142-5p-002248 | | hsa-miR-145-002278 | | hsa-miR-146a-000468 | | hsa-miR-150-000473 | | hsa-miR-15a-000389 | | hsa-miR-15b-000390 | | hsa-miR-16-000391 | | hsa-miR-185-002271 | | hsa-miR-18a-002422 | | hsa-miR-190-000489 | | hsa-miR-191-002299 | | hsa-miR-193b-002367 | | hsa-miR-196b-002215 | | hsa-miR-197-000497 | | hsa-miR-19a-000395 | | hsa-miR-19b-000396 | | hsa-miR-20b-001014 | | hsa-miR-210-000512 | | hsa-miR-21-000397 | | hsa-miR-214-002306 | | hsa-miR-221-000524 | | hsa-miR-224-002099 | | hsa-miR-25-000403 | | hsa-miR-26b-000407 | | hsa-miR-28-000411 | | hsa-miR-320-002277 | | hsa-miR-324-3p-002161 | | hsa-miR-328-000543 | | hsa-miR-335-000546 | | hsa-miR-339-5p-002257 | | hsa-miR-340-002258 | | hsa-miR-362-001273 | | hsa-miR-365-001020 | | hsa-miR-374-000563 | | hsa-miR-384-000574 | | hsa-miR-422a-  002297 | | hsa-miR-424-000604 | | hsa-miR-425-5p-001516 | | hsa-miR-449b-001608 | | hsa-miR-450b-3p-002208 | | hsa-miR-452-002329 | | hsa-miR-483-5p-002338 | | hsa-miR-484-001821 | | hsa-miR-502-001109 | | hsa-miR-502-3p-002083 | | hsa-miR-505-002089 | | hsa-miR-511-001111 | | hsa-miR-518e-002395 | | hsa-miR-576-3p-002351 | | hsa-miR-625-002431 | | hsa-miR-642-001592 | | hsa-miR-652-002352 | | hsa-miR-671-3p-002322 | | hsa-miR-708-002341 | | hsa-miR-744-002324 | | hsa-miR-885-5p-002296 | | hsa-miR-92a-000431 | | mmu-miR-124a-001182 | | mmu-miR-134-001186 | | mmu-miR-374-5p-001319 | | mmu-miR-451-001141 | | mmu-miR-93-001090 | | | -1.43 | | --- | | -2.78 | | 3.26 | | 1.55 | | 2.89 | | -1.42 | | -1.45 | | -1.15 | | 2.23 | | 1.64 | | -4.11 | | -2.79 | |  | | 2.55 | | 2.88 | | -3.12 | | 2.87 | | 0.88 | | 4.22 | | 3.28 | | 2.84 | | 3.89 | | 2.9 | | 2.57 | | 1.22 | | -2.11 | | 1.56 | | 1.54 | | 2.91 | | 2.21 | | 2.55 | | 2.88 | | 4.29 | | -2.11 | | 1.91 | | -1.77 | | 2.9 | | 1.56 | | 1.57 | | -1.45 | | 1.55 | | 1.53 | | -2.77 | | 1.91 | | 2.55 | | 1.9 | | 1.88 | | 2.23 | | 2.68 | | 3.9 | | 1.55 | | 2.91 | | 4.23 | | 1.57 | | -2.79 | | -3.45 | | 1.23 | | 1.54 | | 1.88 | | 1.55 | | 2.56 | | 1.55 | | 2.56 | | 2.57 | | 1.55 | | 1.9 | | 1.22 | | 2.23 | | 1.88 | | 5.89 | | 2.23 | | 2.58 | | -2.44 | | 2.23 | | 3.55 | | 2.91 | | | 0.002 | | --- | | 0.011 | | 0.022 | | 0.045 | | 0.005 | | 0.013 | | 0.023 | | 0.026 | | 0.013 | | 0.041 | | 0.001 | | 0.031 | | 0.015 | | 0.005 | | 0.002 | | 0.017 | | 0.036 | | 0.003 | | 0.007 | | 0.024 | | 0.003 | | 0.005 | | 0.009 | | 0.014 | | 0.040 | | 0.037 | | 0.011 | | 0.050 | | 0.020 | | 0.008 | | 0.009 | | 0.003 | | 0.002 | | 0.029 | | 0.043 | | 0.001 | | 0.041 | | 0.011 | | 0.016 | | 0.001 | | 0.042 | | 0.009 | | 0.005 | | 0.038 | | 0.003 | | 0.016 | | 0.027 | | 0.008 | | 0.001 | | 0.023 | | 0.019 | | 0.014 | | 0.046 | | 0.006 | | 0.024 | | 0.015 | | 0.042 | | 0.003 | | 0.044 | | 0.013 | | 0.040 | | 0.009 | | 0.024 | | 0.010 | | 0.028 | | 0.003 | | 0.03 | | 0.035 | | <0.001 | | 0.019 | | 0.035 | | 0.009 | | 0.014 | | 0.023 | | 0.001 | | | hsa-let-7c-000379 | | --- | | hsa-miR-100-000437 | | hsa-miR-125b-000449 | | hsa-miR-128a-002216 | | hsa-miR-130b-000456 | | hsa-miR-133a-002246 | | hsa-miR-139-5p-002289 | | hsa-miR-142-5p-002248 | | hsa-miR-145-002278 | | hsa-miR-15a-000389 | | hsa-miR-16-000391 | | hsa-miR-185-002271 | | hsa-miR-19a-000395 | | hsa-miR-20b-001014 | | hsa-miR-21-000397 | | hsa-miR-223-002295 | | hsa-miR-25-000403 | | hsa-miR-324-3p-002161 | | hsa-miR-335-000546 | | hsa-miR-424-000604 | | hsa-miR-425-5p-001516 | | hsa-miR-449b-001608 | | hsa-miR-484-001821 | | mmu-miR-93-001090 | | | | -2.98 | | --- | | -2.65 | | -2.67 | | 2 | | 2.7 | | -4.66 | | -4.33 | | 2.33 | | -3.99 | | 2.35 | | 2.31 | | 4.66 | | 2.02 | | 1.34 | | 3.35 | | 2.67 | | 2.7 | | 1.68 | | -3.66 | | 1.67 | | 3.02 | | 5.99 | | 1.01 | | 2.03 | | | 0.014 | | --- | | 0.009 | | 0.010 | | 0.034 | | 0.020 | | 0.006 | | 0.018 | | 0.014 | | 0.009 | | 0.011 | | 0.035 | | 0.042 | | 0.019 | | 0.016 | | 0.049 | | 0.001 | | 0.040 | | 0.002 | | 0.004 | | 0.033 | | 0.015 | | 0.026 | | 0.030  0.005 | | | hsa-miR-138-002284 | | --- | | hsa-miR-885-5p-002296 | | hsa-miR-106a-002169 | | hsa-miR-101-002253 | | hsa-miR-197-000497 | | hsa-miR-15a-000389 | | hsa-miR-30b-000602 | | hsa-miR-301-000528 | | hsa-miR-221-000524 | | mmu-miR-93-001090 | | hsa-miR-30c-000419 | | hsa-miR-100-000437 | | mmu-miR-374-5p-001319 | | hsa-miR-9-000583 | | hsa-miR-125b-000449 | | hsa-miR-224-002099 | | hsa-miR-532-001518 | | hsa-miR-17-002308 | | hsa-miR-671-3p-002322 | | | | -2.21 | | --- | | -5.52 | | -1.21 | | -1.16 | | -2.19 | | -1.87 | | -3.26 | | -3.88 | | -1.23 | | -0.88 | | -2.89 | | -1.88 | | -3.23 | | -2.56 | | -1.52 | | 2.46 | | -1.23 | | -1.56 | | -1.21 | | | 0.001 | | --- | | 0.004 | | 0.008 | | 0.009 | | 0.015 | | 0.016 | | 0.021 | | 0.021 | | 0.022 | | 0.029 | | 0.032 | | 0.032 | | 0.033 | | 0.039 | | 0.040 | | 0.040 | | 0.044 | | 0.045 | | 0.048 | |

Abbreviations: SAR=sarcoidosis; TBLN=tuberculous lymphadenitis; Con=control.

**Table S3**. Targeted genes of differentially expressed miRNA.

| miRNA | miR-145 | miR-185 | miR-301 | miR-425-5P | miR-449b | miR-885-5P |
| --- | --- | --- | --- | --- | --- | --- |
| genesymbol | ABRACL  ARF6  CBFB  CLINT1  ERG  FSCN1  MAP3K3  MYO6  MYRF  NEDD9  PLAGL2  RREB1  RTKN  SERPINE1  SMAD3  TPM3 | ABCG4  ACTN4  CAMK2D  CDC42  EMC10  LPCAT3  PBX2  SF1  SLC8A1  UHMK1 | PTPRG  NUS1  SALL3  CHIC1  ZNF800  RAB14  MAPK1  NIPA1  LDLR  BTBD3  CDK19  NR3C2  DDX6  FXR1  ARL6IP1 | CREBZF | BCL2L13  CCNE2  CDK6  GMFB  LDHA  PPP1R11  TSN | - |

Note: Predicted targeted genes of differentially expressed miRNA respectively. the intersection of target genes, which were experimentally validated according to previous published studies, predicted by TargetScan and miRDB.

**Table S4** KEGG pathways analyzed by the miRNA-target algorithm and the corresponding Targeted genes.

| Category | Term | P Value | Target gene |
| --- | --- | --- | --- |
| hsa05212 | Pancreatic cancer | 0.0011 | CDC42, MAPK1, SMAD3, CDK6 |
| hsa04520 | Adherens junction | 0.0014 | CDC42, MAPK1, ACTN4, SMAD3 |
| hsa04912 | GnRH signaling pathway | 0.0029 | CDC42, MAPK1, MAP3K3, CAMK2D |
| hsa05203 | Viral carcinogenesis | 0.0037 | CCNE2, CDC42, MAPK1, ACTN4, CDK6 |
| hsa04722 | Neurotrophin signaling pathway | 0.0063 | CDC42, MAPK1, MAP3K3, CAMK2D |
| hsa05200 | Pathways in cancer | 0.007 | CCNE2, CDC42, MAPK1, SMAD3, CDK6, TPM3 |
| hsa05214 | Glioma | 0.018 | MAPK1, CAMK2D, CDK6 |
| hsa04115 | p53 signaling pathway | 0.019 | CCNE2, SERPINE1, CDK6 |
| hsa04666 | Fc gamma R-mediated phagocytosis | 0.0291 | CDC42, MAPK1, ARF6 |
| hsa04066 | HIF-1 signaling pathway | 0.0371 | MAPK1, SERPINE1, CAMK2D |
| hsa04144 | Endocytosis | 0.04 | CDC42, LDLR, SMAD3, ARF6 |
| hsa05142 | Chagas disease (American trypanosomiasis | 0.043 | MAPK1, SERPINE1, SMAD3 |
| hsa04114 | Oocyte meiosis | 0.0483 | CCNE2, MAPK1, CAMK2D |
| hsa04110 | Cell cycle | 0.0589 | CCNE2, SMAD3, CDK6 |
| hsa04261 | Adrenergic signaling in cardiomyocytes | 0.0711 | MAPK1, CAMK2D, TPM3 |
| hsa05161 | Hepatitis B | 0.0775 | CCNE2, MAPK1, CDK6 |
| hsa05216 | Thyroid cancer | 0.0889 | MAPK1, TPM3 |
